# Supplementary material
Source: publisher site journal article supplement (https://www.dovepress.com/article/250930)
Supplement: Supplementary file 1 [file get_supplementary_file.php]

**Supplementary material 1: Information about source population and designed sample size**

| **College** | **Departments** | **Number of sample designed** | **Number of source population** |
| --- | --- | --- | --- |
| Agricultural sciences | Agro-economics | 82 | 523 |
| Animal science | 16 | 102 |
| Plant science | 22 | 140 |
| Natural resource management | 17 | 108 |
| **Sub-total** | **137** | **873** |
| Business and Economics | Accounting & Finance | 23 | 147 |
| Management | 22 | 140 |
| Economics | 18 | 115 |
| **Sub-total** | **63** | **402** |
| Computational and Natural Sciences | Biology | 27 | 172 |
| Chemistry | 16 | 103 |
| Physics | 19 | 121 |
| Mathematics | 15 | 96 |
| **Sub-total** | **77** | **492** |
| Social Sciences and Humanities | English | 17 | 109 |
| Geography | 24 | 153 |
| History | 15 | 96 |
| **Sub-total** | **56** | **358** |
| **Grand Total** | | **333** | **2,125** |

**Supplementary Material 2: Questionnaire**

**Questionnaire used for assessing Knowledge, Attitude and Practice of Jinka University Students towards Yellow Fever, Southern Ethiopia, 2019**

**Code __________________ College/school ________________ Department _____________**

**Date _____/_____/_________**

Dear study participants, please kindly provide the following information.

***Part I: Participants’ Socio-demographic Data***

| **Q. No.** | **Questions** | **Value level** | **Skip to** |
| --- | --- | --- | --- |
| 101 | Sex | 1. Male 2. Female |  |
| 102 | Age | ___________________­­­ years |  |
| 103 | Religion | 1. Orthodox 2. Muslim 3. Protestant 4. Catholic 5. Others (specify) _________ |  |
| 104 | Educational year | 1. First 2. Second |  |
| 105 | Birth place (born and grown) | _________________________________ |  |

**Part II: Participants’ knowledge towards Yellow Fever**

| **Q. No.** | **Questions** | **Value level** | **Skip to** |
| --- | --- | --- | --- |
| 201 | Have you ever heard about yellow fever? | 1) Yes 2) No | If no stop here |
| 202 | If question number 201 yes, from whom you heard? (more than one answer is possible) | 1) From a friend 2) Health professional 3) From radio (mass media) 4) I or/member of my family have been sick/died 5) From another sick person 6) other ______ |  |
| 203 | Do you know the signs and symptoms of yellow fever? | 1) Yes 2) No | If no, go to Q205 |
| 204 | If question number 203 yes, could you please mention some of the main signs? (more than one answer is possible) | 1) fever 2) Head ache 3) yellowish eye and skin 4) Muscle and back pain 5) vomiting blood 6) loss of appetite 7) blood mixed diarrhea 8) Other_____ |  |
| 205 | Do you know the cause of yellow fever? | 1 ) yes 2) No | If no, go to Q207 |
| 206 | If yes what is the cause | 1) Virus 2) bacteria or germ 3) Other)_______ |  |
| 207 | Have you ever heard about malaria? | 1) Yes 2) No | if no, go to Q213 |
| 208 | If question number 207 yes, would you mention signs/symptoms of malaria? (more than one answer is possible) | 1) fever 2) Head ache 3) making eye and skin yellow 4) Muscle and back pain 5) vomiting blood 6) loss of appetite 7) blood mixed diarrhea 8) Other___________ |  |
| 209 | Do you think that there is a difference between yellow fever and malaria? | 1) Yes 2) No 3 ) I do not know | if 2/3, go to Q213 |
| 210 | If question number 209 yes, do you think that the causative agent of yellow fever is different from malaria? | 1) Yes 2) No 3) I do not know | if 2/3, go to Q213 |
| 211 | Is there a difference between the signs of Malaria and Yellow Fever? | 1) Yes 2) No 3) I do not know | if 2/3, go to Q213 |
| 212 | Is the treatment for malaria different from yellow fever treatment? | 1) yes 2) No 3) I do not know |  |
| 213 | Does yellow fever transmit from person to person? | 1) Yes 2) No 3) I do not know | if 2/3, go to Q219 |
| 214 | If question number 213 yes, how it does? | 1) through mosquito bites 2) through fly bites 3) through breathing 4) through body contact 5) communal use of feeding/drinking materials 6) through contamination of body fluid such as blood, vomit 7) Other ____________ |  |
| 215 | If yellow fever is transmitted through mosquitoes bite, do you think that a mosquito which transmits malaria also transmits yellow fever? | 1) Yes 2) No 3) I do not know | if 1/3, go to Q219 |
| 216 | If question number 215 no, do you know the name of a mosquito which transmits yellow fever | 1) yes 2) No | if no, go to Q218 |
| 217 | If question number 216 yes, the name of the mosquito | ___________________ |  |
| 218 | Biting time of mosquitoes which transmit yellow fever? | 1) Day time at home 2) day time in forest area 3) night time at home 4) both day and night 5) I do not know |  |
| 219 | Have you ever heard that yellow fever can be transmitted from monkeys to human? | 1) Yes 2) No | if no, go to Q221 |
| 220 | If question number 19 yes, how can it be transmitted? | 1) Through mosquitoes bite 2) through fly bites 3) Other_______ |  |
| 221 | Do you know other diseases which look like yellow fever and can be transmitted through mosquito bites? | 1) Yes 2) no | if no, go to Q223 |
| 222 | If question number 221 yes, please could you mention some of them? | _____________________ |  |
| 223 | Is yellow fever a preventable disease? | 1) Yes 2) no 3) I don’t know | if 2/3, go to Q301 |
| 224 | If question number 223 yes, what are the main prevention methods? | 1) vaccination 2) prevent mosquito biting 3) spraying chemicals around dormitories 4) Other_________ |  |
| 225 | If you reply vaccination (for question number 224), are you vaccinated for yellow fever? | 1) yes 2) No |  |
| 226 | If question number 225 yes, when and where? | when______________ and where ___________________ |  |

**Part III: participants’ attitude towards yellow fever**

| **Q. No.** | **Questions** | **Value level** | **Skip to** |
| --- | --- | --- | --- |
| 301 | Do you think that yellow fever is a major public health issue in your birth place? | 1) yes 2) no 3) I am not sure |  |
| 302 | Do you think that yellow fever occurs in and around Jinka? | 1) yes 2) no 3) I am not sure |  |
| 303 | Do you think yellow fever affects all age groups (both adult and children)? | 1) yes 2) no 3) I am not sure |  |
| 304 | Do you agree that yellow fever is a fatal/killer disease? | 1) yes 2) no 3) I am not sure |  |
| 305 | Do you feel that you are at risk of getting yellow fever? | 1) yes 2) no 3) I am not sure |  |
| 306 | Do you believe that unvaccinated persons are at a high risk of getting yellow fever? | 1) yes 2) no 3) I am not sure |  |
| 307 | Do you think that yellow fever is an easily treatable disease? | 1) Yes 2) No 3) not sure |  |
| 308 | Do you think that a person who is working/living in a forest area like Mago Park is at a high risk of getting yellow fever? | 1) yes 2) no 3) not sure |  |

**Part IV: Participants’ practice towards preventing yellow fever risk practices**

| **Q. No.** | **Questions** | **Value level** | **Skip to** |
| --- | --- | --- | --- |
| 401 | Do you visit/go to a forest/jungle area like around Mago National Park? | 1) yes daily, 2), yes sometimes, 3) no |  |
| 402 | If yes, for what purpose do you go to a forest area? | 1) to sit under a tree and study 2) to visit wild life 3) recreation 4) other _________ |  |
| 403 | Did you get an orientation/awareness about yellow fever when you joined Jinka University? | 1) yes 2) no |  |
| 404 | Did you received a vaccine for yellow fever when you joined Jinka University? | 1) yes 2) no |  |

**Supplementary Material 3: STROBE checklist**

STROBE Statement—Checklist of items that should be included in reports of ***cross-sectional studies***

|  | Item No | Recommendation |
| --- | --- | --- |
| **Title and abstract** | 1 | (*a*) Indicate the study’s design with a commonly used term in the title or the abstract:  Indicated in the abstract, paragraph 2 |
| (*b*) Provide in the abstract an informative and balanced summary of what was done and what was found:  Indicated in the abstract, paragraph 2 and 3 |
| Introduction | | |
| Background/rationale | 2 | Explain the scientific background and rationale for the investigation being reported:  Indicated in the background, paragraph 1-3 |
| Objectives | 3 | State specific objectives, including any pre-specified hypotheses:  Indicated in the background, paragraph 3 |
| Methods | | |
| Study design | 4 | Present key elements of study design early in the paper:  Indicated in the methods section, sub-heading ‘study area, design and period’, paragraph 1 |
| Setting | 5 | Describe the setting, locations, and relevant dates, including periods of recruitment, exposure, follow-up, and data collection:  Indicated in the methods section, sub-heading ‘study area, design and period’, paragraph 1 |
| Participants | 6 | (*a*) Give the eligibility criteria, and the sources and methods of selection of participants:  Indicated in the methods section, sub-heading ‘study population, participants and eligibility criteria’, paragraph 1 and sub-heading ‘sample size and sampling technique’, paragraph 1 |
| Variables | 7 | Clearly define all outcomes, exposures, predictors, potential confounders, and effect modifiers. Give diagnostic criteria, if applicable:  Indicated in the methods section, under the sub-heading of ‘data collection’, paragraph 1 and sub-heading of ‘data management and analysis’, paragraph 1 |
| Data sources/ measurement | 8* | For each variable of interest, give sources of data and details of methods of assessment (measurement). Describe comparability of assessment methods if there is more than one group:  Indicated in the methods section, under the sub-heading of ‘data collection’, paragraph 1 and sub-heading of ‘data management and analysis’, paragraph 1 |
| Bias | 9 | Describe any efforts to address potential sources of bias:  Indicated in the methods section, under the sub-heading of ‘sample size and sampling technique’, paragraph 1 |
| Study size | 10 | Explain how the study size was arrived at:  Indicated in the methods section, under the sub-heading of ‘sample size and sampling technique’, paragraph 1 |
| Quantitative variables | 11 | Explain how quantitative variables were handled in the analyses. If applicable, describe which groupings were chosen and why: Indicated in the methods section, under the sub-heading of ‘data management and analysis’, paragraph 1 and 2 |
| Statistical methods | 12 | (*a*) Describe all statistical methods, including those used to control for confounding:  Indicated in the methods section, under the sub-heading of ‘data management and analysis’, paragraph 2 |
| (*b*) Describe any methods used to examine subgroups and interactions  NA |
| (*c*) Explain how missing data were addressed  Missing data were excluded from the analysis |
| (*d*) If applicable, describe analytical methods taking account of sampling strategy  NA |
| (*e*) Describe any sensitivity analyses  NA |
| Results | | |
| Participants | 13* | (a) Report numbers of individuals at each stage of study— e.g. numbers potentially eligible, examined for eligibility, confirmed eligible, included in the study, completing follow-up, and analyzed: Indicated in the result section, sub-heading ‘Socio-demographic characteristics of study participants, paragraph 1 |
| (b) Give reasons for non-participation at each stage  NA |
| (c) Consider use of a flow diagram  NA |
| Descriptive data | 14* | (a) Give characteristics of study participants (e.g. demographic, clinical, social) and information on exposures and potential confounders:  Indicated in the result section, Table 1 |
| (b) Indicate number of participants with missing data for each variable of interest  Indicated in the result section, Table 2-5 |
| Outcome data | 15* | Report numbers of outcome events or summary measures: Reported in the result section, Table 2-6 |
| Main results | 16 | (*a*) Give unadjusted estimates and, if applicable, confounder-adjusted estimates and their precision (eg, 95% confidence interval). Make clear which confounders were adjusted for and why they were included:  Indicated in the result section, Table 6 |
| (*b*) Report category boundaries when continuous variables were categorized:  Indicated the result section, Table 1 and 6 |
| (*c*) If relevant, consider translating estimates of relative risk into absolute risk for a meaningful time period  NA |
| Other analyses | 17 | Report other analyses done—eg analyses of subgroups and interactions, and sensitivity analyses  NA |
| Discussion | | |
| Key results | 18 | Summarise key results with reference to study objectives:  Indicated in the discussion part, paragraph 1-6 |
| Limitations | 19 | Discuss limitations of the study, taking into account sources of potential bias or imprecision. Discuss both direction and magnitude of any potential bias:  Indicated after the discussion section, sub-heading ‘Limitations of the study’, paragraph 1 |
| Interpretation | 20 | Give a cautious overall interpretation of results considering objectives, limitations, multiplicity of analyses, results from similar studies, and other relevant evidence:  Indicated in the discussion part, paragraph 1-6 |
| Generalisability | 21 | Discuss the generalisability (external validity) of the study results:  Indicated in the discussion part, paragraph 1-6 |
| Other information | | |
| Funding | 22 | Give the source of funding and the role of the funders for the present study and, if applicable, for the original study on which the present article is based:  The study was financially supported by the Office of Vice President for Research and Technology Transfer, Addis Ababa University (Ref No. RD/PY662/2016). The funders had no role in study design, data collection and analysis, decision to publish, or preparation of the manuscript (indicated in the “declarations” section under sub-heading funding). |

*Give information separately for exposed and unexposed groups.

**Note:** An Explanation and Elaboration article discusses each checklist item and gives methodological background and published examples of transparent reporting. The STROBE checklist is best used in conjunction with this article (freely available on the Web sites of PLoS Medicine at http://www.plosmedicine.org/, Annals of Internal Medicine at http://www.annals.org/, and Epidemiology at http://www.epidem.com/). Information on the STROBE Initiative is available at [www.strobe-statement.org](http://www.strobe-statement.org).
